# Supplementary material for: Resveratrol and organic selenium-rich fermented milk reduces d-galactose-induced cognitive dysfunction in mice
Source: Royal Society of Chemistry journal article supplement (doi:10.1039/d0fo02029j), 2020-12-18
Supplement: d0fo02029j1.pdf [file d0fo02029j1.pdf]

**Table S1.** The qPCR primers of the genes related hippocampus tissue samples

| Gene            | Primer (5'-3')          |
|-----------------|-------------------------|
| <i>bdnf</i> -F  | TCATACTTCGGTTGCATGAAGG  |
| <i>bdnf</i> -R  | AGACCTCTCGAACCTGCCC     |
| <i>creb</i> -F  | CTGAGAGCTGGTATGTCAGGA   |
| <i>creb</i> -R  | TGAGTGCTGGAGTAAAACAGTCA |
| <i>erk</i> -F   | GGTTGTTCCCAAATGCTGACT   |
| <i>erk</i> -R   | CAACTTCAATCCTCTTGAGGG   |
| <i>gapdh</i> -F | AGGTCGGTGTGAACGGATTTG   |
| <i>gapdh</i> -R | TGTAGACCATGTAGTTGAGGTCA |
